# Supplementary material
Source: MDPI journal article supplement (https://www.mdpi.com/2673-933X/4/1/7)
Supplement: s1 [file s1]

Archive with 1 entries (1 files):
- ruminants-2769216-supplementary.pdf
